# Supplementary material
Source: Springer Nature journal article supplement (https://www.springermedizin.de/resource/supplementary/12887_2014_1051_MOESM2_ESM.pdf/9476380)
Supplement: MOESM2 [file 9476380]

## Additional file 2 –Study participants' characteristics

|                             |                    | Treatment Group    |                      | Group comparison† |
|-----------------------------|--------------------|--------------------|----------------------|-------------------|
|                             |                    | Control (C; n=139) | Treatment (I; n=218) |                   |
| Grade level                 | First grade        | 48                 | 68                   | I>C               |
|                             | Second grade       | 55                 | 76                   |                   |
|                             | Third grade        | 36                 | 74                   |                   |
| Children age in months      |                    | 52.74/9.12         | 54.10/9.50           | n.s.              |
| Family monthly income (RMB) |                    | 1,1165/2155        | 1,0290/3407          | C>I               |
| Father education            | <=High school      | 2%                 | 8%                   | n.s.              |
|                             | College/university | 64%                | 58%                  |                   |
|                             | Postgraduate       | 34%                | 34%                  |                   |
| Mother education            | <=High school      | 11%                | 11%                  | n.s.              |
|                             | College/university | 69%                | 68%                  |                   |
|                             | Postgraduate       | 20%                | 21%                  |                   |
| Father obesity              | Normal weight      | 32%                | 45%                  | C>I               |
|                             | Overweight/obese   | 69%                | 55%                  |                   |
| Mother obesity              | Normal weight      | 99%                | 95%                  | n.s.              |
|                             | Overweight/obese   | 1%                 | 5%                   |                   |

† Comparison based on F-test for continuous measures and chi-square test for categorical measures ( $\alpha \leq 0.05$ )
